# Supplementary material for: Randomized Clinical Trial Comparing Basal Insulin Peglispro and Insulin Glargine in Patients With Type 2 Diabetes Previously Treated With Basal Insulin: IMAGINE 5
Source: Oxford University Press journal article supplement (doi:10.2337/dc15-1531), 2015-11-17

SUPPLEMENTARY DATA

**Supplementary Table 1. Study inclusion and exclusion criteria**

|                                                                                                                                                                                                                                                                                                                                                                                                                                                                               |
|-------------------------------------------------------------------------------------------------------------------------------------------------------------------------------------------------------------------------------------------------------------------------------------------------------------------------------------------------------------------------------------------------------------------------------------------------------------------------------|
| <b>Inclusion criteria included:</b>                                                                                                                                                                                                                                                                                                                                                                                                                                           |
| <ul style="list-style-type: none"> <li>• Adults (<math>\geq 18</math> years old) with type 2 diabetes (World Health Organization criteria)</li> </ul>                                                                                                                                                                                                                                                                                                                         |
| <ul style="list-style-type: none"> <li>• Duration of diabetes <math>\geq 1</math> year</li> </ul>                                                                                                                                                                                                                                                                                                                                                                             |
| <ul style="list-style-type: none"> <li>• Receiving basal insulin (NPH [isophane], insulin detemir or insulin glargine) and from 0 to 3 OAMs for <math>\geq 90</math> days prior to the study. Doses of oral antihyperglycemic medications (OAMs) were required to be stable for <math>\geq 90</math> days prior to Visit 1 (at least 1 of the OAMs <math>\geq</math> half the maximum daily dose allowed by local regulations or at the maximally tolerated dose).</li> </ul> |
| <ul style="list-style-type: none"> <li>• HbA1c <math>\leq 9.0\%</math> (75 mmol/mol)</li> </ul>                                                                                                                                                                                                                                                                                                                                                                               |
| <ul style="list-style-type: none"> <li>• Body Mass Index <math>\leq 45.0</math> kg/m<sup>2</sup></li> </ul>                                                                                                                                                                                                                                                                                                                                                                   |
| <b>Exclusion criteria included:</b>                                                                                                                                                                                                                                                                                                                                                                                                                                           |
| <ul style="list-style-type: none"> <li>• Use of a routine regimen of insulin glargine twice daily in the past 90 days or routine use of prandial (rapid-acting) insulin therapy (outside of pregnancy) anytime in the past 6 months (except for short-term), Use of rosiglitazone, pramlintide, glucagon-like peptide-1 receptor agonist or weight-loss medications within 90 days prior to screening</li> </ul>                                                              |
| <ul style="list-style-type: none"> <li>• Use of niacin preparations as a lipid-lowering medication or bile acid sequestrants within 90 days prior to Visit 1</li> </ul>                                                                                                                                                                                                                                                                                                       |
| <ul style="list-style-type: none"> <li>• Use of lipid-lowering medication at a dose that was not stable within 90 days prior to screening</li> </ul>                                                                                                                                                                                                                                                                                                                          |
| <ul style="list-style-type: none"> <li>• Any episodes of severe hypoglycemia, diabetic ketoacidosis or hyperglycemic hyperosmolar nonketotic coma within 6 months prior to Visit 1</li> </ul>                                                                                                                                                                                                                                                                                 |
| <ul style="list-style-type: none"> <li>• New York Heart Association Class III or IV cardiac disease</li> </ul>                                                                                                                                                                                                                                                                                                                                                                |
| <ul style="list-style-type: none"> <li>• History of renal transplantation</li> </ul>                                                                                                                                                                                                                                                                                                                                                                                          |
| <ul style="list-style-type: none"> <li>• Current renal dialysis</li> </ul>                                                                                                                                                                                                                                                                                                                                                                                                    |
| <ul style="list-style-type: none"> <li>• Serum creatinine <math>\geq 2</math> mg/dL (177 <math>\mu</math>mol/L)</li> </ul>                                                                                                                                                                                                                                                                                                                                                    |
| <ul style="list-style-type: none"> <li>• Obvious clinical signs of liver disease (excluding non-alcoholic fatty liver disease)</li> </ul>                                                                                                                                                                                                                                                                                                                                     |
| <ul style="list-style-type: none"> <li>• Acute or chronic hepatitis</li> </ul>                                                                                                                                                                                                                                                                                                                                                                                                |
| <ul style="list-style-type: none"> <li>• Non-alcoholic steatohepatitis</li> </ul>                                                                                                                                                                                                                                                                                                                                                                                             |
| <ul style="list-style-type: none"> <li>• Elevated liver enzyme measurements                             <ul style="list-style-type: none"> <li>○ total bilirubin <math>\geq 2</math>x upper limit of normal (ULN)</li> <li>○ Alanine aminotransferase (ALT) <math>&gt; 2.5</math>x ULN</li> <li>○ Aspartate aminotransferase (AST) <math>&gt; 2.5</math>x ULN</li> </ul> </li> </ul>                                                                                          |
| <ul style="list-style-type: none"> <li>• Fasting triglycerides <math>&gt; 400</math> mg/dL</li> </ul>                                                                                                                                                                                                                                                                                                                                                                         |
| <ul style="list-style-type: none"> <li>• Active or untreated malignancy</li> </ul>                                                                                                                                                                                                                                                                                                                                                                                            |
| <ul style="list-style-type: none"> <li>• In remission from clinically significant malignancy (other than basal cell or squamous cell skin cancer) for <math>&lt; 5</math> years</li> </ul>                                                                                                                                                                                                                                                                                    |
| <ul style="list-style-type: none"> <li>• Increased risk for new or recurrent cancer in the opinion of the investigator</li> </ul>                                                                                                                                                                                                                                                                                                                                             |
| <ul style="list-style-type: none"> <li>• Blood transfusion or severe blood loss within 3 months prior to Visit 1</li> </ul>                                                                                                                                                                                                                                                                                                                                                   |
| <ul style="list-style-type: none"> <li>• Hemoglobin abnormality known to interfere with measurement of HbA1c</li> </ul>                                                                                                                                                                                                                                                                                                                                                       |
| <ul style="list-style-type: none"> <li>• A known hypersensitivity or allergy to study insulins or their excipients.</li> </ul>                                                                                                                                                                                                                                                                                                                                                |

SUPPLEMENTARY DATA

**Supplementary Table 2. List of Investigators by Country**

**Czech Republic:** Dagmar Bartaskova, Petra Horanska, Sarka Kopecka, Lea Raclavska

**Germany:** Susanne Höltz, Gerhard Klausmann, Frank Schaper, Simon Vidal, Hubert Wübbolding.

**Greece:** Iakovos Avramidis, Georgios Chaliotis, Kalliopi Kotsa

**Israel:** Michaela Garber, Adiv Goldhaber, Naim Shehadeh, Julio Wainstein,

**Romania:** Gheorghe Ghise, Amarin Remus Popa, Georgeta Vacaru, Mihaela Vlaiculescu

**Russia:** Svetlana Ivanova, Svetlana Mustafina, Natalia Zhavoronkova

**Spain:** Luis Ciprés Casasnovas, Esteban Jodar Gimeno, Mercedes Codina Marcet, Alejandro López Suárez, Carlos Trescoli Serrano

**United States:** Angela Adelizzi, Marie Albert, Royal Anspach, Timothy Bailey, Bruce Barker, Philip Behn, Thomas Blevins, Bradley Block, John Buse, Rafael Canadas, Anna Chang, A. Jay Cohen, Lisa Cohen, Richard Dobrusin, Rachel Espiritu, Daniel Honeycutt, Andrew Kim, Eric Klein, Gregory Ledger, Peter Levins, Robert Lipetz, Hiralal Maheshwari, Wilfred McKenzie, Francisco Miranda, Paul Norwood, Kerem Ozer, John Chip Reed, Angel Comulada Rivera, Helena Rodbard, Julio Rosenstock, John Rubino, Luis Ruiz-Rivera, Gerald Shockey, Robert Silver, Larry Stonesifer, Danny Sugimoto, Ralph Wade, Alan Wynne

SUPPLEMENTARY DATA

**Supplementary Table 3. Insulin initiation and dose adjustment**

**A. Initiation of bedtime dosing of study basal insulin**

| <b>Entry basal insulin regimen</b>         | <b>Study basal insulin initiation</b>                                                                                                                                                                                                                                                             |
|--------------------------------------------|---------------------------------------------------------------------------------------------------------------------------------------------------------------------------------------------------------------------------------------------------------------------------------------------------|
| once-daily pre-study insulin dose          | Initiated insulin peglispro or insulin glargine at the same dose at bedtime on the night of Visit 3                                                                                                                                                                                               |
| twice-daily insulin detemir or NPH insulin | Received 80% of the total daily insulin dose as the initial dose of study insulin at bedtime on the night of Visit 3                                                                                                                                                                              |
| pre-study morning-only basal insulin       | Converted to bedtime administration as follows: 50% of the prescribed study insulin dose at the site the morning of Visit 3 and the remaining 50% at bedtime on the night of Visit 3. Thereafter, these patients continued the full prescribed study insulin dose on the night following Visit 3. |

**B. Treat to Target Algorithm\***

| <b>Median Fasting Blood Glucose (from SMBG) Days 5, 6, and 7 since the last insulin dose increment</b>                                                                                               | <b>Change in Study Basal Insulin Dose</b>                       |
|------------------------------------------------------------------------------------------------------------------------------------------------------------------------------------------------------|-----------------------------------------------------------------|
| 101- 120 mg/dL                                                                                                                                                                                       | 2 Unit increase                                                 |
| 121 – 140 mg/dL                                                                                                                                                                                      | 4 Unit increase                                                 |
| 141-180 mg/dL                                                                                                                                                                                        | 6 Unit increase                                                 |
| Greater than 180 mg/dL                                                                                                                                                                               | 8 Unit increase                                                 |
| If any SMBG value during the preceding week was $\leq 70$ mg/dL                                                                                                                                      | No dose increase                                                |
| If multiple episodes of hypoglycemia with SMBG $\leq 70$ mg/dL were recorded, if severe hypoglycemia (requiring assistance) occurred, or if any SMBG value was $\leq 54$ mg/dL in the preceding week | Dose decreases of 2 to 4 Units based on investigator's judgment |

Abbreviation: FBG = fasting blood glucose, SMBG = self-monitored blood glucose

\*Treat-to-target FBG was  $\leq 100$  mg/dL

SUPPLEMENTARY DATA

**Supplementary Table 4. Lipid and Hepatic Criteria for Study Insulin Discontinuation**

| <b>Lipid and Hepatic Criteria for Study Insulin Discontinuation</b>                                                                                  |
|------------------------------------------------------------------------------------------------------------------------------------------------------|
| Fasting triglyceride level >600 mg/dL                                                                                                                |
| ALT or AST >8x ULN                                                                                                                                   |
| ALT or AST >5x ULN for >2 weeks                                                                                                                      |
| ALT or AST >3x ULN and total bilirubin level >2x ULN or prothrombin time >1.5x ULN                                                                   |
| ALT or AST >3x ULN with the appearance of fatigue, nausea, vomiting, right upper quadrant pain or tenderness, fever, rash, and/or eosinophilia (>5%) |

Abbreviation: ALT = alanine aminotransferase, AST = aspartate aminotransferase, SMBG = self-monitored blood glucose, ULN = upper limit of normal

SUPPLEMENTARY DATA

**Supplementary Table 5. Percent of Patients Experiencing Treatment-Emergent Adverse Events and Serious Adverse Events from Randomization to the End of the Study**

| System Organ Class Preferred Term                    | Treatment-Emergent Adverse Events |              |         | Serious Adverse Events |              |         |
|------------------------------------------------------|-----------------------------------|--------------|---------|------------------------|--------------|---------|
|                                                      | GL<br>N=159                       | BIL<br>N=305 | P-value | GL<br>N=159            | BIL<br>N=305 | P-value |
| Patients with ≥1 event                               | 67.3                              | 73.4         | 0.19    | 13.8                   | 11.8         | 0.56    |
| Blood and lymphatic system disorders                 | 3.8                               | 1.3          | 0.10    | 0                      | 0            | --      |
| Cardiac disorders                                    | 8.8                               | 4.6          | 0.10    | 6.9                    | 2.3          | 0.02    |
| Congenital, familial and genetic disorders           | 0.6                               | 0            | 0.34    | 0                      | 0            | --      |
| Ear and labyrinth disorders                          | 3.8                               | 3.6          | >0.99   | 0                      | 0            | --      |
| Endocrine disorders                                  | 1.3                               | 1.3          | >0.99   | 0                      | 0            | --      |
| Eye disorders                                        | 2.5                               | 5.2          | 0.23    | 0                      | 0.3          | >0.99   |
| Gastrointestinal disorders                           | 22.0                              | 22.6         | 0.91    | 0                      | 1.3          | 0.30    |
| General disorders and administration site conditions | 8.2                               | 8.5          | >0.99   | 0.6                    | 1.3          | 0.67    |
| Hepatobiliary disorders                              | 1.9                               | 3.0          | 0.76    | 0                      | 0            | --      |
| Immune system disorders                              | 1.3                               | 2.0          | 0.72    | 0                      | 0            | --      |
| Infections and infestations                          | 40.3                              | 42.6         | 0.69    | 1.3                    | 2.3          | 0.73    |
| Injury, poisoning and procedural complications       | 11.3                              | 8.2          | 0.31    | 1.3                    | 1.0          | >0.99   |
| Investigations                                       | 6.9                               | 7.9          | 0.85    | 0                      | 1.0          | 0.55    |
| Metabolism and nutrition disorders                   | 8.8                               | 4.3          | 0.06    | 1.9*                   | 0            | 0.04    |
| Musculoskeletal and connective tissue disorders      | 23.3                              | 21.0         | 0.64    | 0                      | 0.7          | 0.55    |
| Neoplasms benign, malignant and unspecified          | 3.1                               | 3.0          | >0.99   | 2.5                    | 1.0          | 0.24    |
| Nervous system disorders                             | 15.1                              | 15.4         | >0.99   | 1.3                    | 1.0          | >0.99   |
| Psychiatric disorders                                | 4.4                               | 5.2          | 0.82    | 0                      | 0.3          | >0.99   |
| Renal and urinary disorders                          | 4.4                               | 4.3          | >0.99   | 0                      | 0.3          | >0.99   |
| Reproductive system and breast disorders             | 2.5                               | 4.9          | 0.32    | 0.6                    | 1.0          | >0.99   |
| Respiratory, thoracic and mediastinal disorders      | 14.5                              | 10.5         | 0.23    | 0.6                    | 1.0          | >0.99   |
| Skin and subcutaneous tissue disorders               | 6.3                               | 12.5         | 0.04    | 0                      | 0            | --      |
| Surgical and medical procedures                      | 7.5                               | 9.2          | 0.61    | 0                      | 0            | --      |
| Vascular disorders                                   | 5.0                               | 3.9          | 0.63    | 0.6                    | 0.0          | 0.34    |

Abbreviation: BIL = Basal insulin peglispro, GL = insulin glargine  
 N numbers reflect maximal sample size  
 \*Hypoglycemia (n=2) and Hypovolemia (n=1)

SUPPLEMENTARY DATA

**Supplementary Figure 1. Study Design.** \*One-week pre-randomization period in between Visits 2 and 3. Abbreviations: OAM = oral antihyperglycemic medication.

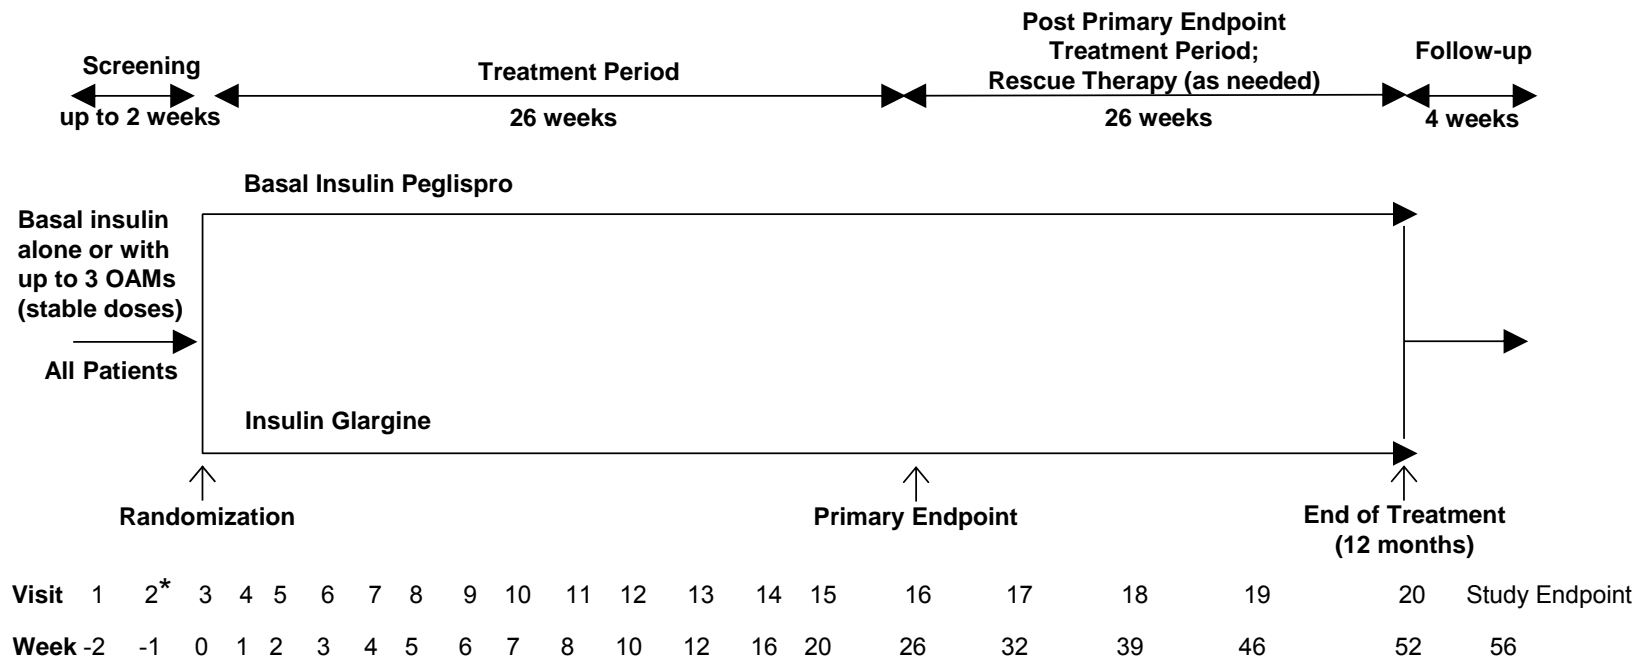

SUPPLEMENTARY DATA

Supplementary Figure 2. Participant Flow Diagram

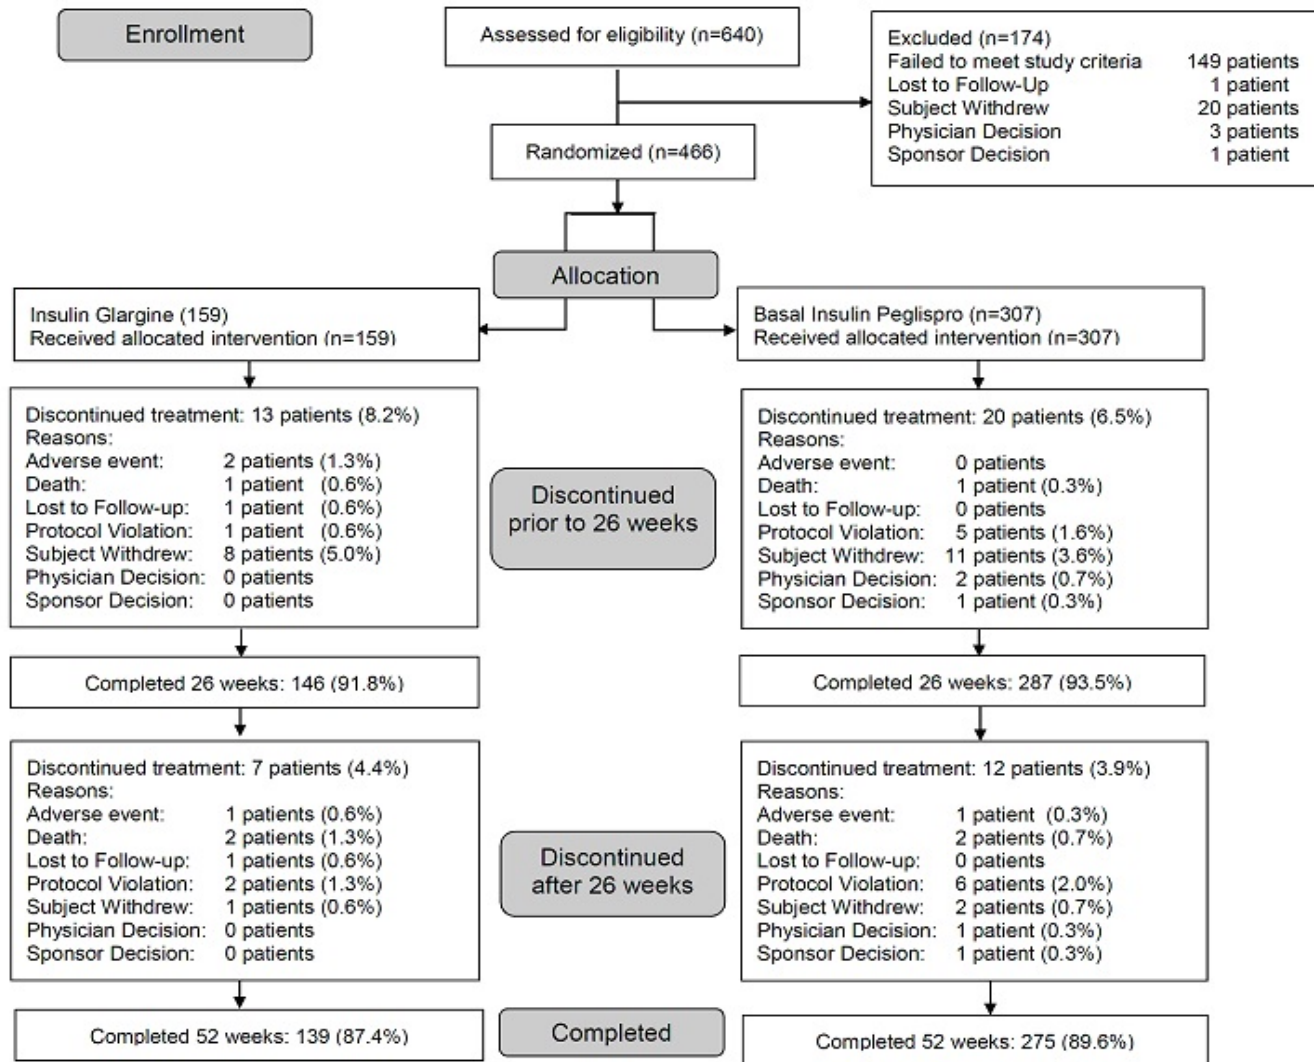

SUPPLEMENTARY DATA

**Supplementary Figure 3. Six-point self-monitored blood glucose profile at 26 weeks** Pre-morning = fasting (pre-morning meal); Pre-Midday = pre-mid-day meal; Pre-evening = preevening meal. Abbreviations: BIL = basal insulin peglispro, GL = insulin glargine. Data are least squares mean (LSM) ± standard error (SE). \*p-values <0.05 for between treatment group comparisons.

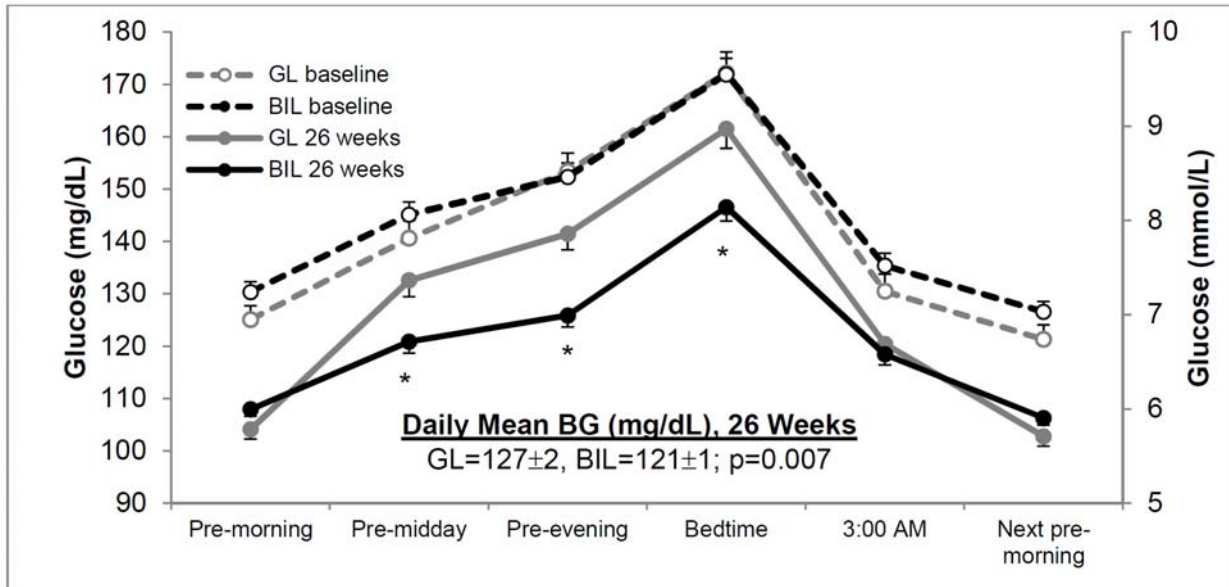



SUPPLEMENTARY DATA

**Supplementary Figure 4. Lipid Profile Over The Course of the Study.** (A) Triglycerides. (B) High density lipoprotein cholesterol (HDL-C). (C) Low density lipoprotein cholesterol (LDL-C). (D) Total cholesterol. Closed circles with solid line = basal insulin lispro (BIL), open circles with dashed line = insulin glargine. Data are least squares mean (LSM) ± standard error (SE). Study endpoint indicates last visit completed including 4-week follow-up visit. \*p<0.05 for between treatment group comparisons.

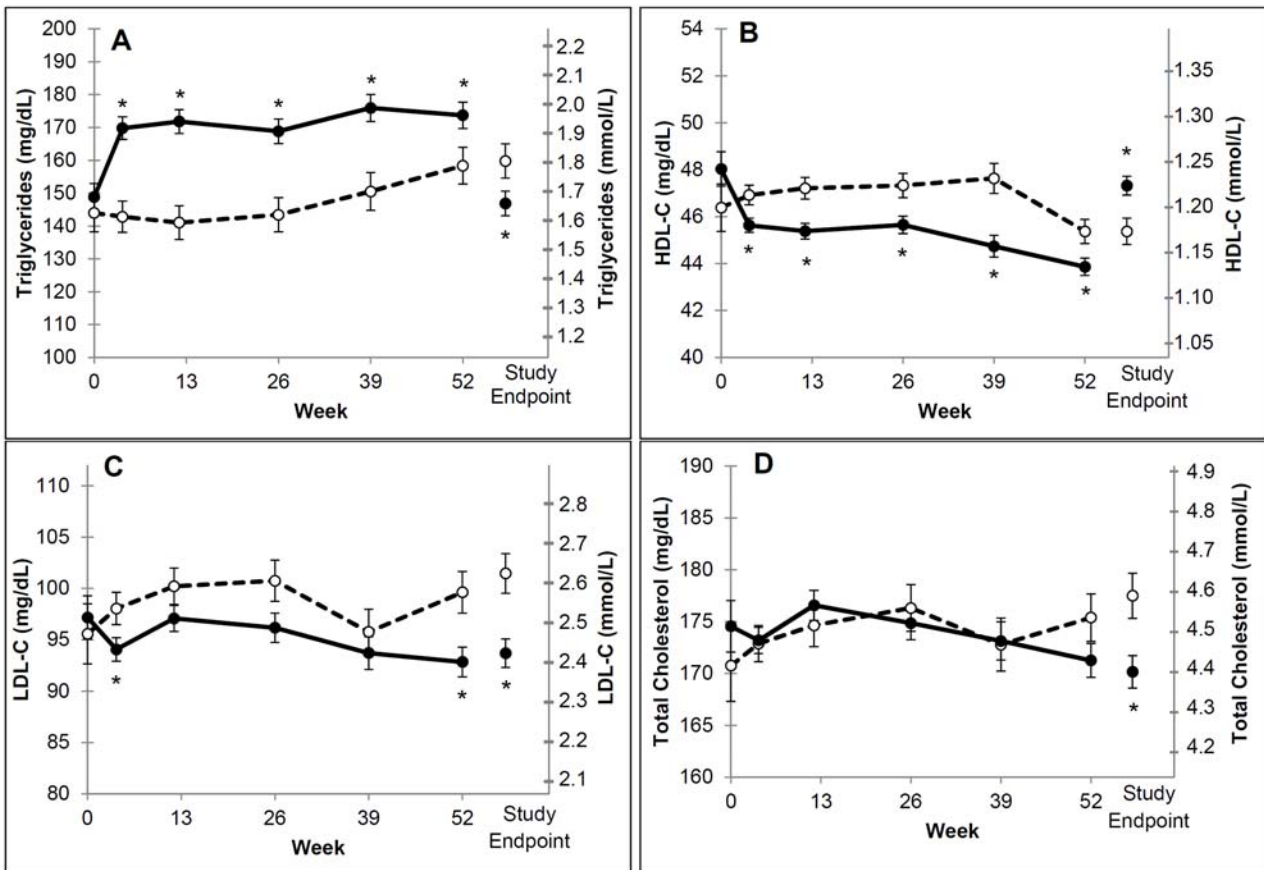

SUPPLEMENTARY DATA

**Supplementary Figure 5. Alanine Aminotransferase (ALT) Over The Course of the Study.** Closed circles with solid line = basal insulin lispro (BIL), open circles with dashed line = insulin glargine. Data are least squares mean (LSM)  $\pm$  standard error (SE). Study endpoint indicates last visit completed including 4-week follow-up visit. \* $p < 0.05$  for between treatment group comparisons.

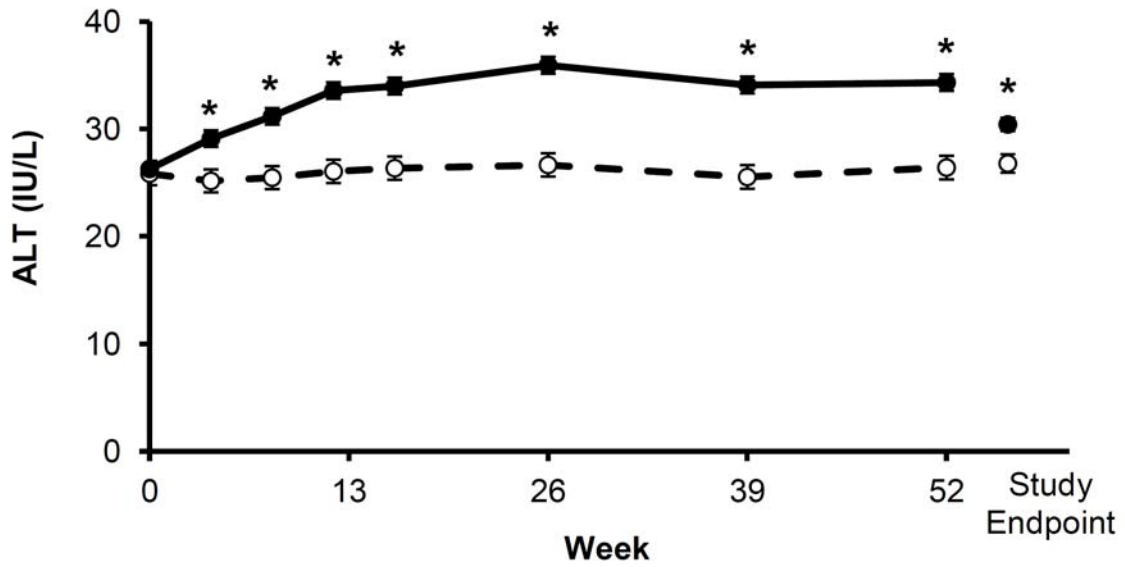

Supplement: dc151531supplementarydata.pdf [file dc151531supplementarydata.pdf]
